# Supplementary material
Source: publisher figshare collection journal article supplement (https://frontiersin.figshare.com/ndownloader/files/17935781)
Supplement: Supplementary file 1 [file 17935781]

**Effect of electrode properties on the performance of a photosynthetic microbial fuel cell for atrazine detection**

Lola Gonzalez Olias,1,2 Petra J. Cameron,3 Mirella Di Lorenzo1,*

1 Centre for Biosensors, Bioelectronics and Biodevices (C3Bio) and Department of Chemical Engineering, University of Bath, Bath BA2 7AY, United Kingdom

2 Water Innovation Research Centre (WIRC), University of Bath, Bath BA2 7AY, United Kingdom

3 Department of Chemistry, University of Bath, Bath BA2 7AY, United Kingdom

**Supplementary information**


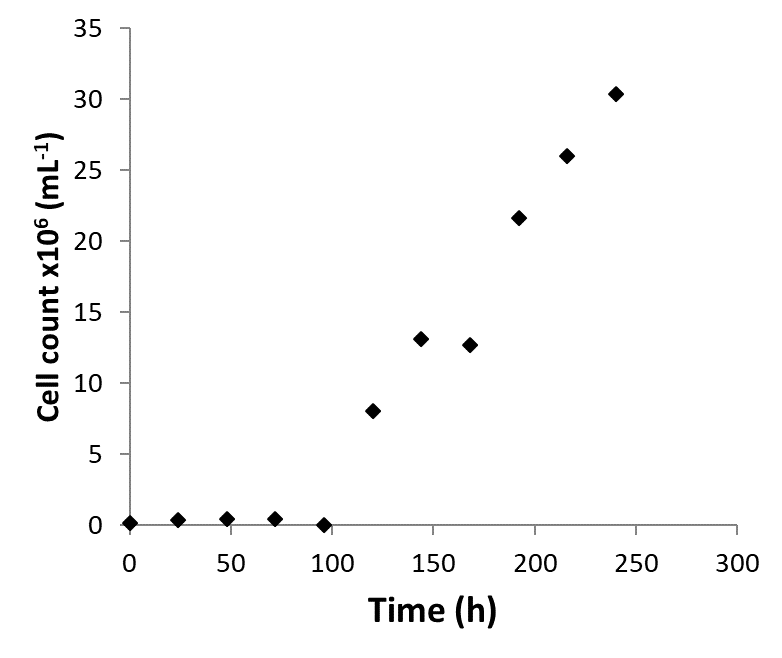

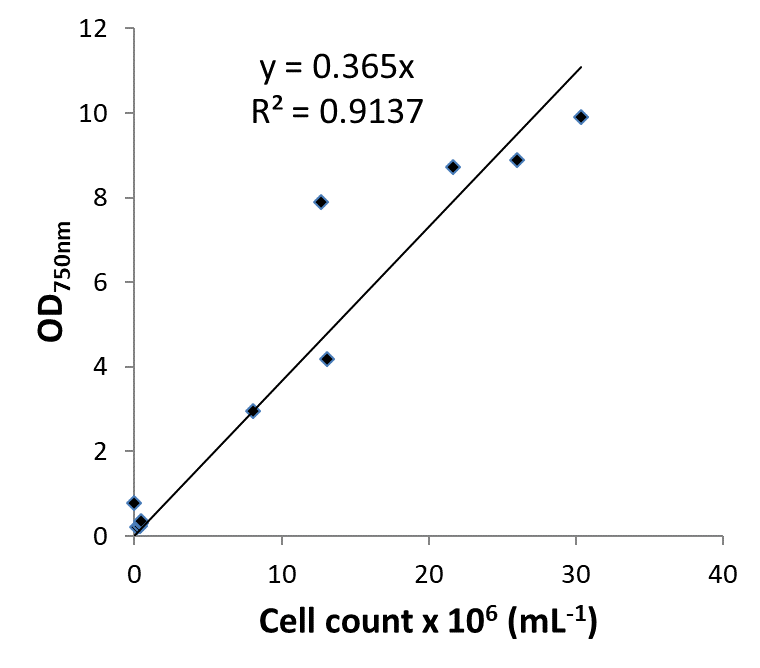


*Figure S1. Growth curves of Sc. Obliquus on BBM in batch at 25 ̊C and 12h/12h white light regime of 5 lm m-1. Cell count and OD were assessed on a daily basis for 10 days. The growth curve was not continued until steady state because after 10 days the culture started to clump and OD measurements became unreliable.*


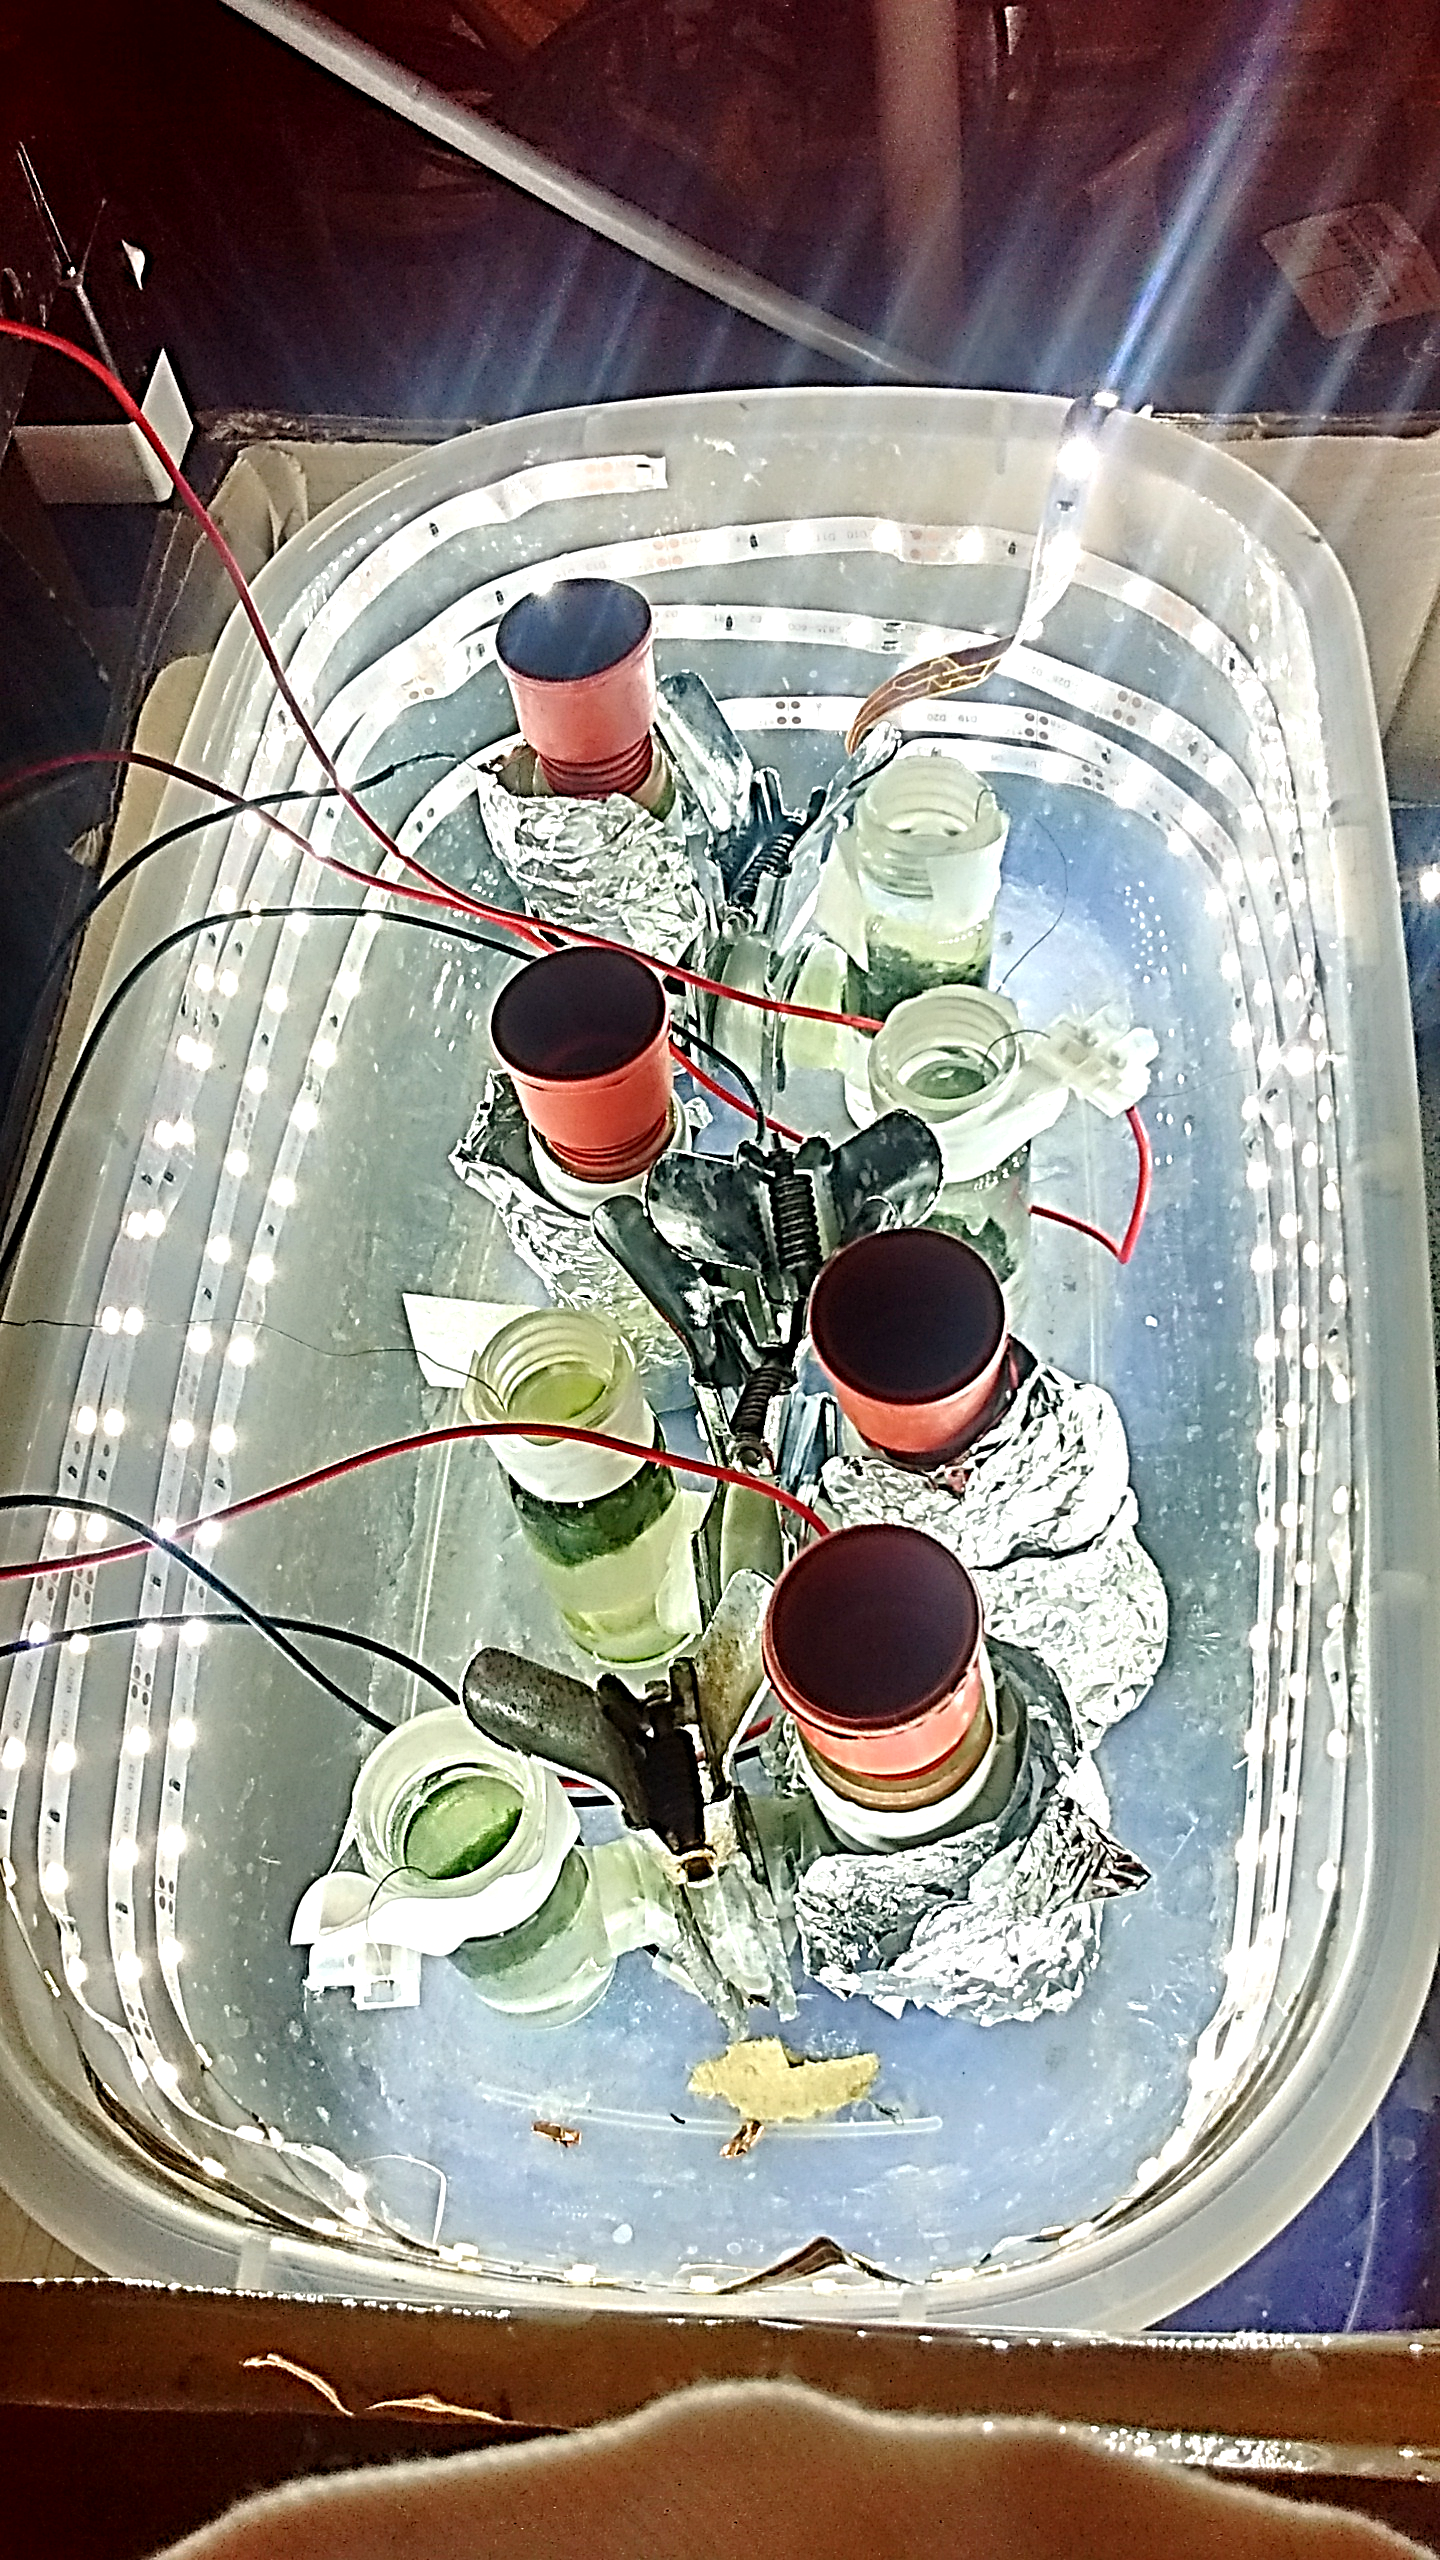

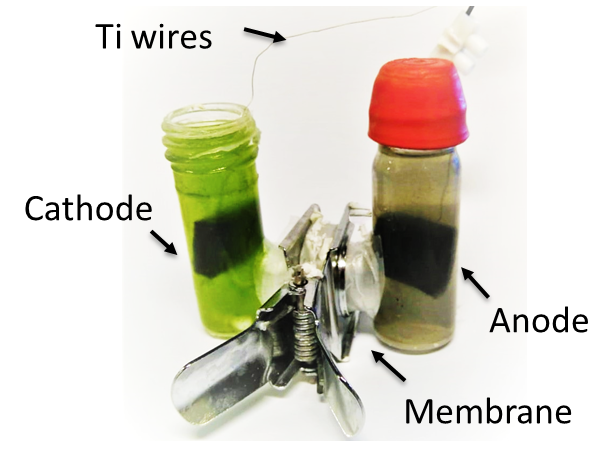


*Figure S2. Experimental set up (left). Example of the H-cell p-MFC for graphite felt (right).*


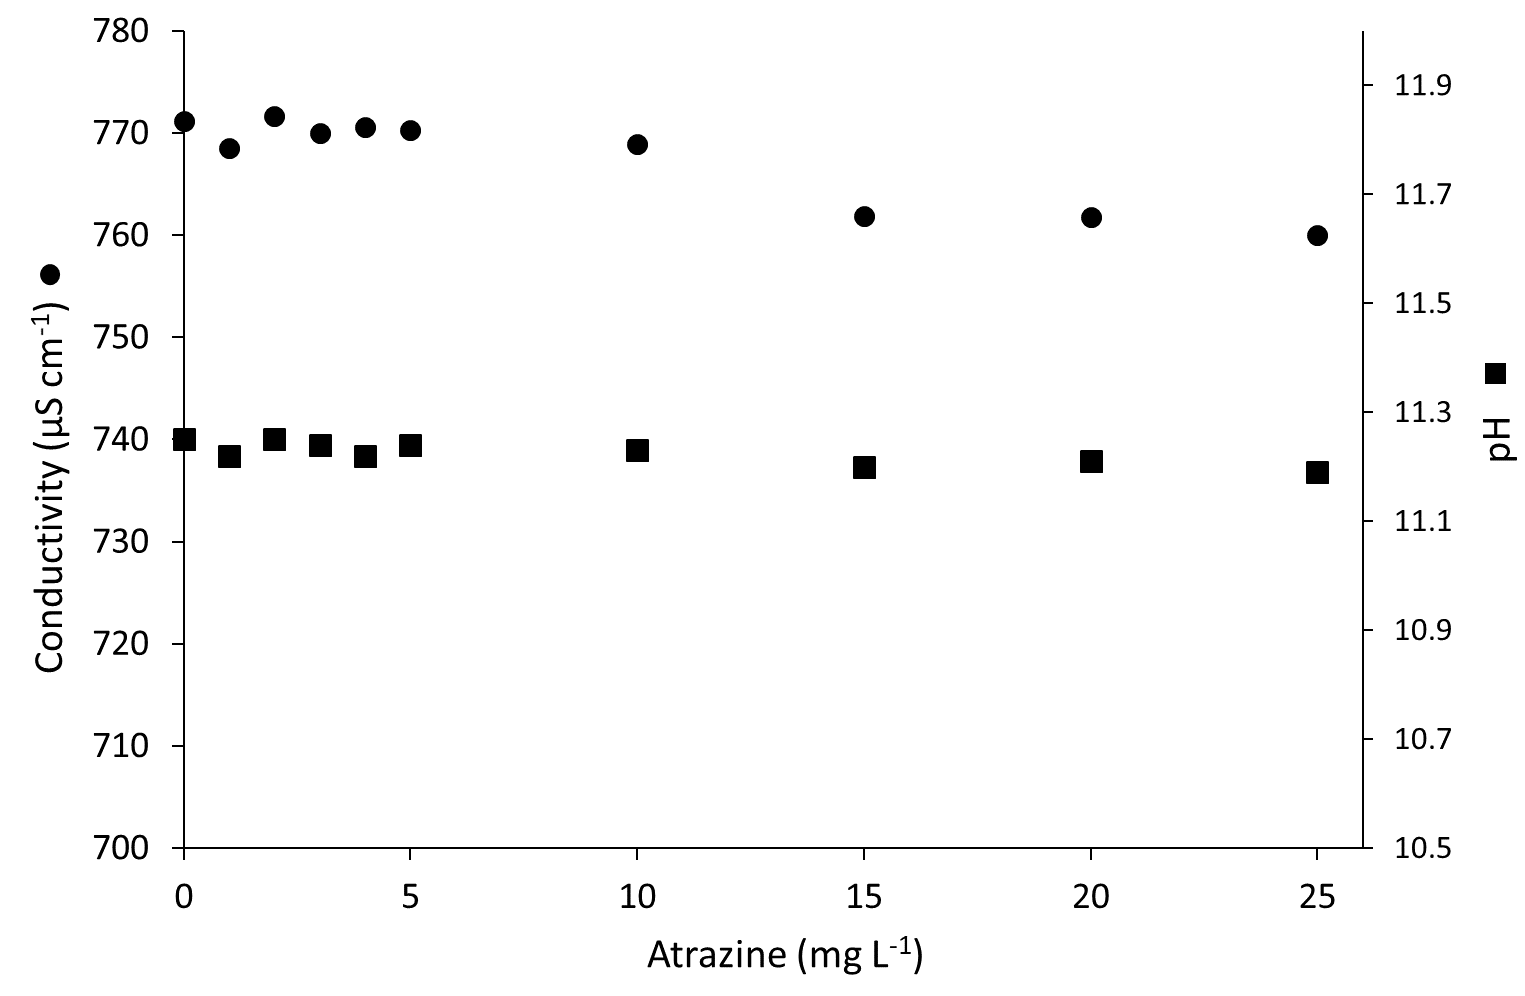


*Figure S3. Catholyte pH and conductivity evolution over time after atrazine addition. The study was performed in a catholyte extracted from the cathode chamber after 20 days of operation.*


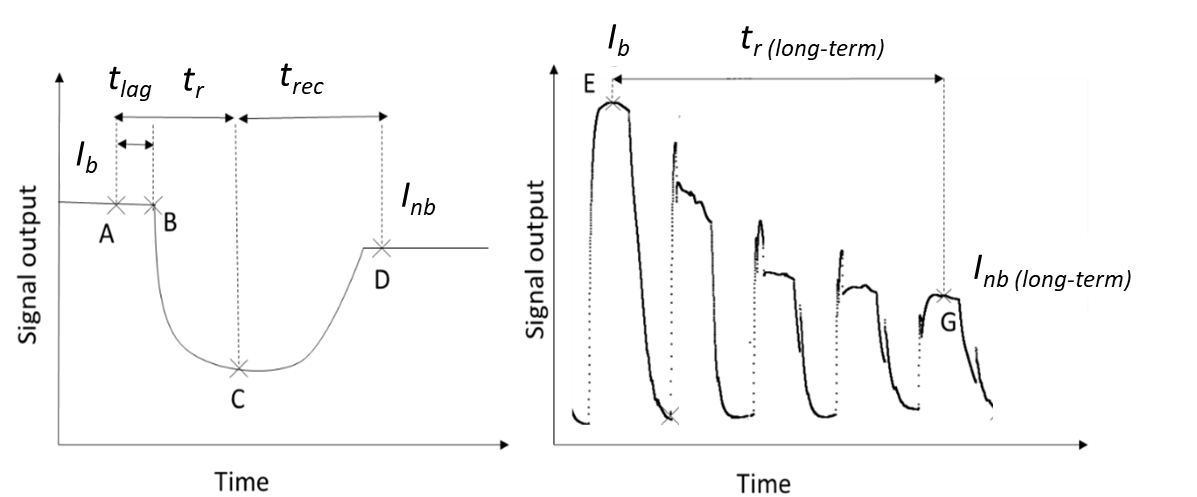


*Figure S4. Example of the short-term response (left) and long-term response (right) of the p-MFCs to a toxic event. A is the moment of injection of the toxicant. B indicates the moment when a response is observed in the signal output. C is the moment when the current has reached the 95% of its steady state following the change in current. D is the point when the sensor has recovered from the toxicant event. E is the moment when the day baseline of the photosynthetic cycle stabilises. Ib is the day current baseline before the event, Inb is the day current baseline after the event. tlag is the lag period from the injection of the toxicant until it reached the biofilm. tr is the response time of the sensor. trec is the recovery time of the sensor.*


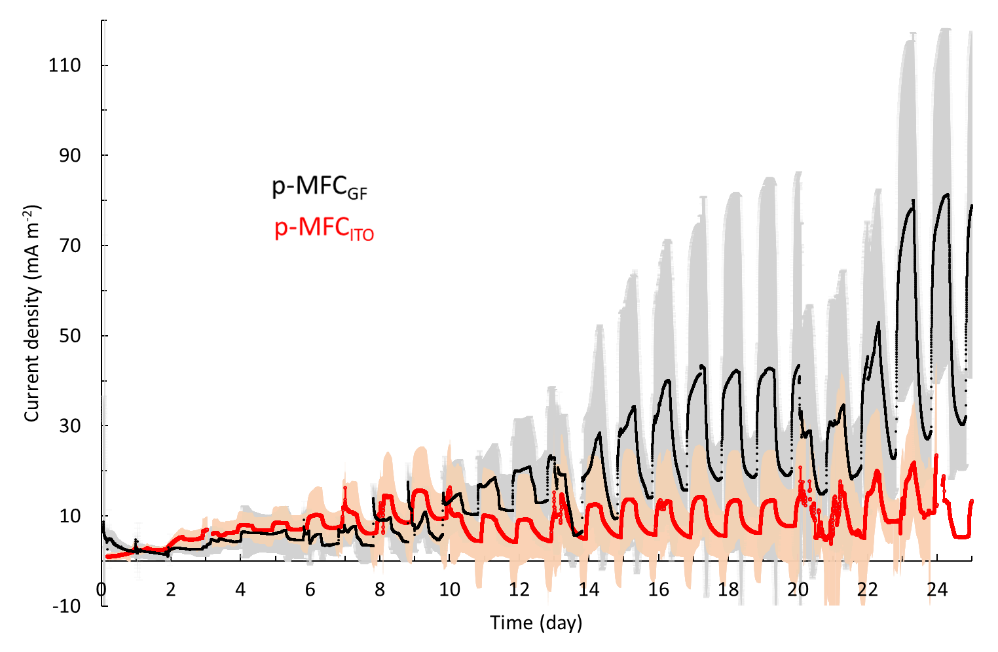


*Figure S5. Start-up period of the p-MFCs with error bars. P-MFCGF corresponds to the black line and p-MFCITO to the red line. Current density refers to the projected surface area. Error bars correspond to the standard deviation of 6 replicates.*

*.*


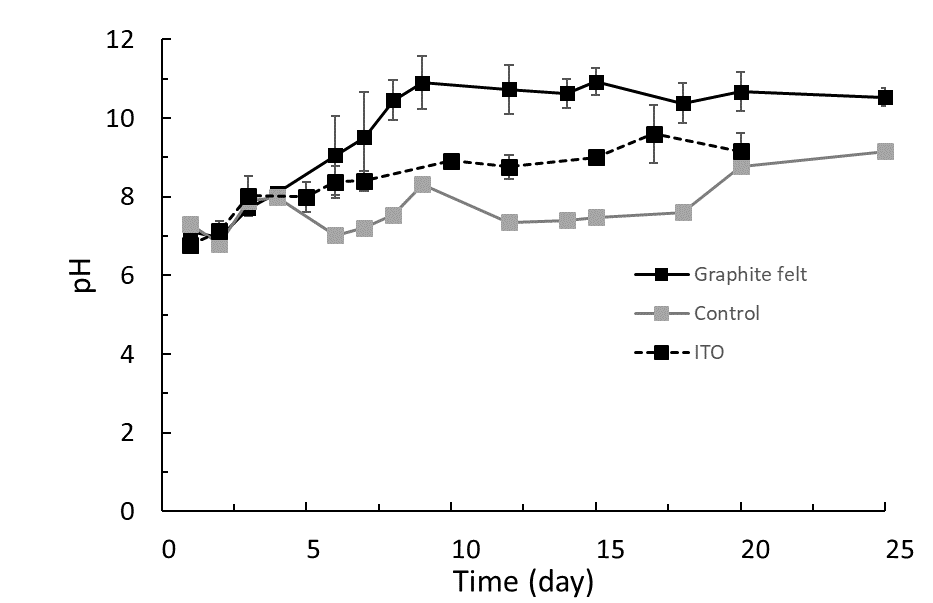
*
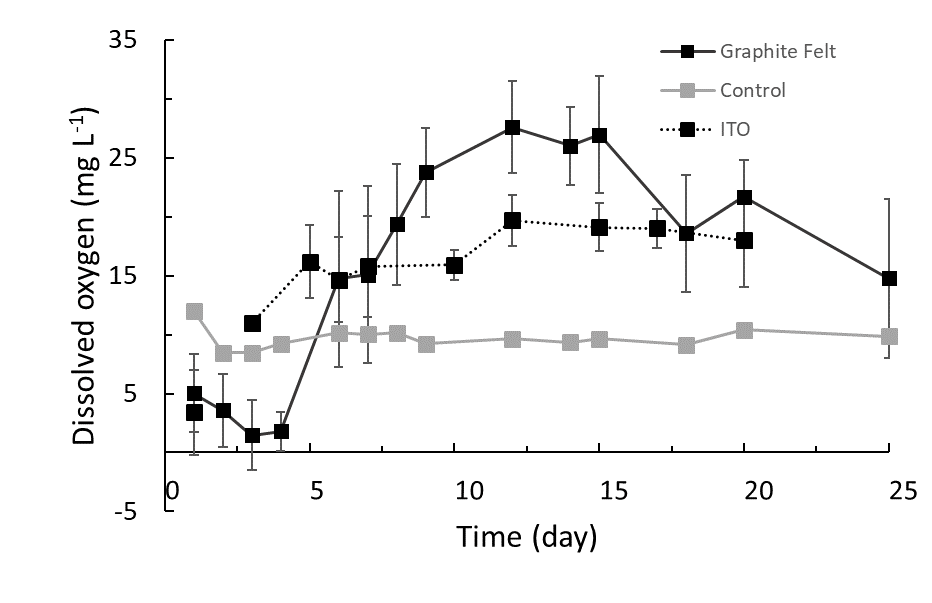
*

*Figure S6. Values of pH and dissolved oxygen evolution in the catholyte during the start up. The control refers to a beaker with the catholyte solution only without the cathode, so that no electrochemical reactions would occur. In each case, the same starting algal solution was used as described in the Methods Section.*

*Figure S7. Power density curves of the p-MFCGF (black) and p-MFCITO (grey). Data points are the average of two replicates. The power curve corresponds to the polarisation curves on Figure 2.*

*Figure S8. SEM images of the electrodes at 10 kW x1000 magnification. A and B refer to* p-MFCGF *and* p-MFCITO *not exposed to atrazine. C and D refer to* p-MFCGF *and* p-MFCITO *exposed to atrazine. The images were taken after three months of operation and one month after the first exposure to atrazine.*


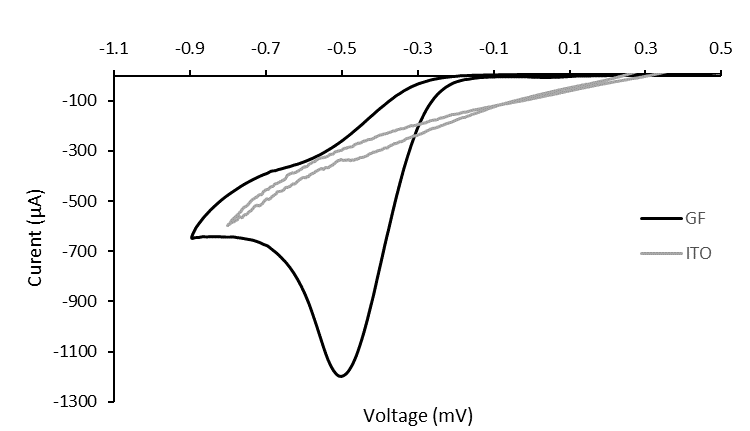


*Figure S9. Cyclic voltammetry of the colonised cathodes at a scan rate of 1 mV s-1 vs. Ag/AgCl, under light. The curves are the third scan, representative of two replicates. Dissolved oxygen concentrations of the electrolyte are similar in both cases, around 10 mg L-1.*

*.*





*Figure S10. Linear fitting of cathodic DO with current for p-MFCGF on a 12h light cycle. The analysis was performed with OriginPro 9.*

*
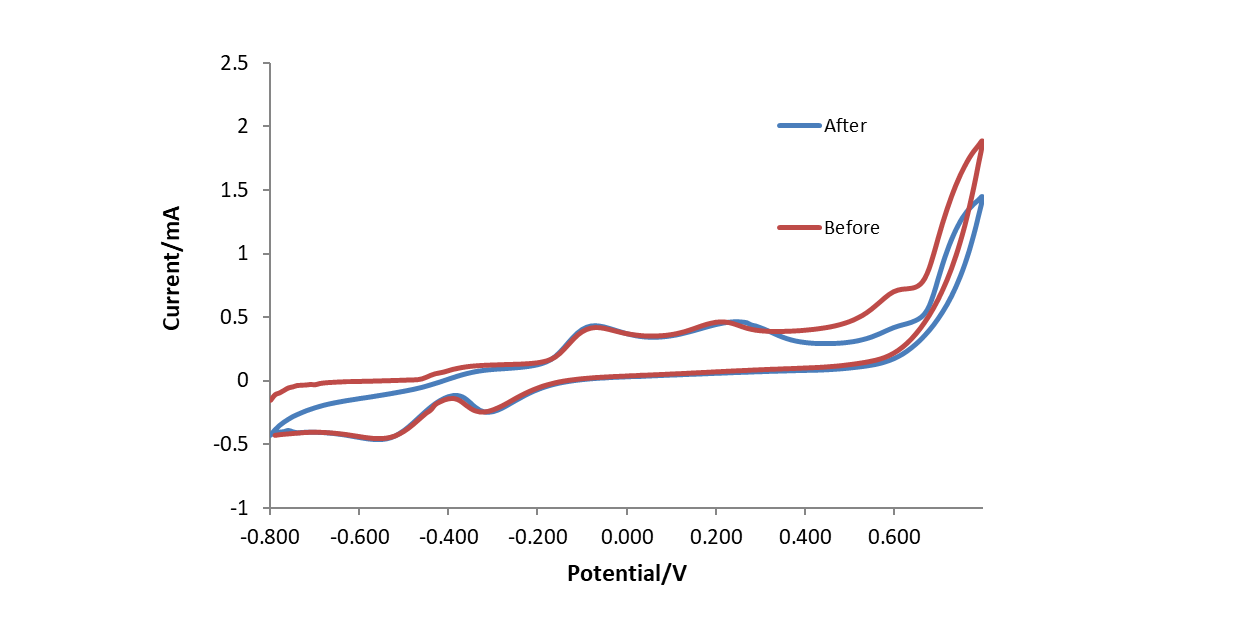
*

*Figure S11. Cyclic voltammogram at the anode of the p-MFC before (red line), and after (blue line) the injection of atrazine. The tests were performed in a three-electrode set-up with Ag/AgCl as the reference electrode and Pt as the counter electrode at a scan rate of 1 mV s-1. The graph shows the third scan of one sample.*

*Figure S12. Response of the sensors to 0.1 µg L-1 of atrazine for p-MFCGF (A) and p-MFCITO (B) during the first 24 h after intoxication. Black lines correspond to the fuel cells exposed to atrazine and grey lines correspond to the control p-MFCs. Mean values and error bars (absolute error) correspond to two replicates.*

Table S1. Summary of performance of two-chamber p-MFC previously reported.

| **Cathode material** | **Cathodic algae** | **OCV (mV)** | **Rint (Ω)** | **Max power density**  **(mW m-2)** | **pH** | **DO**  **(mg mL-1)** | **Ref.** |
| --- | --- | --- | --- | --- | --- | --- | --- |
| Carbon cloth/10%Teflon | Mixed |  | 9600 | 11.5 | 7.5 | 7.5 | [25] |
| Carbon fibre cloth | *Ch. Vulgaris* | 429 | 138 | 44.6 | 7 | 5.65 | [26] |
| Carbon fibre cloth | *Ch. species* | 379 | 158 | 39.75 | 7 | 5.22 | [26] |
| 0.5 mg/cm2 platinum coated carbon paper | *Sc. Obliquus* | 897 | 438 | 154 | 7 | 6.5 | [10] |
| Carbon cloth 10%Teflon | *Ch. Vulgaris* | 462 | 1300 | 14.4 | 7 | 6 | [27] |
| GF | *Desmo-desmus sp. A8* | 410 | 136 | 64.2 |  | 7.5 | [18] |
| CC/Pt 0.1mg/cm2 | *Ch. Vulgaris* | 805 |  | 2300 |  | 7.6 | [28] |
| CP 0.5 mg/cm2 Pt | *Sc. Obliquus* |  | 673 | 34.2 |  |  | [29] |
| ITO/PET | *Sc. Obliquus/*  mixed | 485 | 5230 | 1.52±1.45 | 9 | 12 | This study |
| GF acid treated | *Sc. Obliquus/*  mixed | 497 | 1866 | 6.63±0.81 | 9 | 15 | This study |
